# Supplementary material
Source: PubMed Central journal article supplement (PMC5444513)
Supplement: Supp_Fig1.pdf [file Supp_Fig1.pdf]

## Supplementary Data

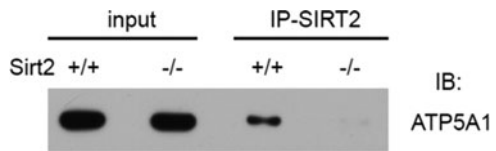

**SUPPLEMENTARY FIG. S1. SIRT2 interacts with mitochondrial protein.** Lysates from Cortex tissues were harvested, subsequently IPed with anti-SIRT2 antibody, and blotted with ATP5A1. IP, immunoprecipitation; SIRT2, NAD-dependent protein deacetylase sirtuin-2.
