# Supplementary material
Source: PubMed Central journal article supplement (PMC5444513)
Supplement: Supp_Fig2.pdf [file Supp_Fig2.pdf]

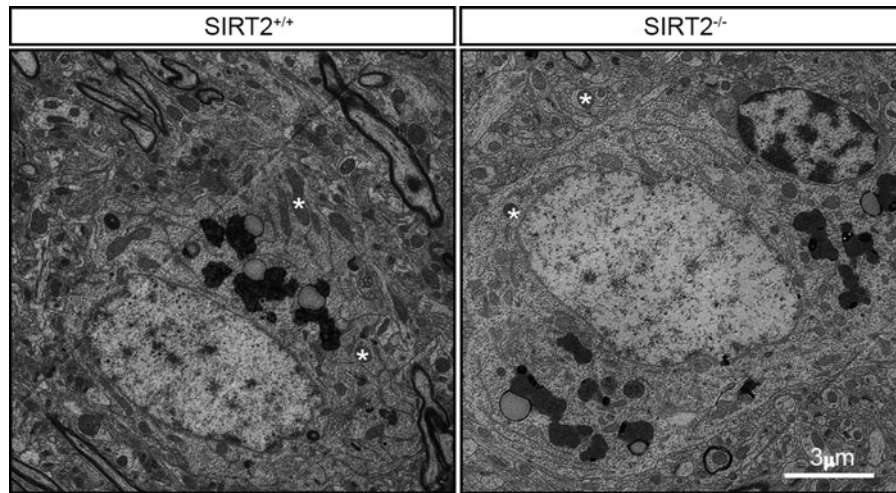

**SUPPLEMENTARY FIG. S2. Loss of *Sirt2* makes mitochondria rounder and smaller relative to controls.** Wild-type and *Sirt2*<sup>-/-</sup> brain sections from the neocortex of isogenic, 24 month-old mice were prepared and subjected to electron microscopy. Representative images are shown. *Asterisks* indicate the position of mitochondria. Scale bar: 3 μm.
