# Supplementary material
Source: PubMed Central journal article supplement (PMC5444513)
Supplement: Supp_Fig3.pdf [file Supp_Fig3.pdf]

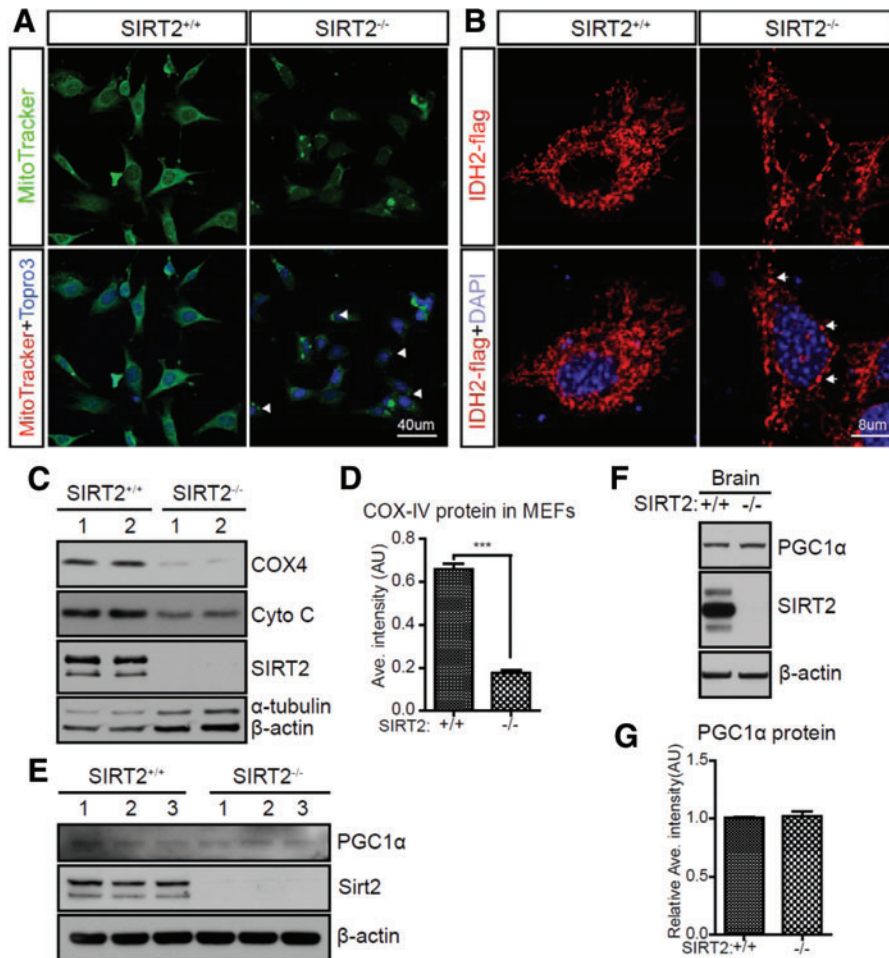

**SUPPLEMENTARY FIG. S3. Loss of *Sirt2* changes the morphology of mitochondria in MEFs.** (A) *Sirt2*<sup>+/+</sup> and *Sirt2*<sup>-/-</sup> MEFs were stained with MitoTracker (green) and To-pro3 (blue) and subjected to immunofluorescence microscopy. White arrowheads point to condensed mitochondria. Scale bar: 40 μm. (B) *Sirt2*<sup>+/+</sup> and *Sirt2*<sup>-/-</sup> MEFs were transfected with Flag-tagged IDH2 and stained with anti-IDH2. Mitochondria were visualized by anti-Flag staining. White arrows point to swollen mitochondria. Scale bar: 8 μm. (C) Wild-type and *Sirt2*<sup>-/-</sup> MEFs were harvested and, subsequently, immunoblotted with anti-COX-IV, cytochrome C (Cyto C), and SIRT2 antibodies. β-Actin and α-tubulin were used as the loading control. The Western blot shows that lower levels of COX-IV and cytochrome C were found in *Sirt2*<sup>-/-</sup> MEFs compared with controls. (D) Bar graph quantifies the relative expression levels of COX-IV in homogenates of wild-type and *Sirt2*<sup>-/-</sup> MEFs. Data are presented as the mean ± SEM (n=5). \*\*\*p < 0.001. (E) Western blot shows the expression level of PGC-1α in *Sirt2*<sup>+/+</sup> and *Sirt2*<sup>-/-</sup> MEFs. (F) Representative Western blot shows the expression level of PGC-1α in 24 month-old *Sirt2*<sup>+/+</sup> and *Sirt2*<sup>-/-</sup> mouse brains. (G) Bar graph quantifies the relative expression level of PGC-1α in homogenates of 24 month-old *Sirt2*<sup>+/+</sup> and *Sirt2*<sup>-/-</sup> mouse brains. Data are presented as the mean ± SEM (n=3). IDH2, isocitrate dehydrogenase 2 (NADP+); MEF, mouse embryonic fibroblast; SEM, standard error of the mean.
