# Supplementary material
Source: PubMed Central journal article supplement (PMC5444513)
Supplement: Supp_Fig4.pdf [file Supp_Fig4.pdf]

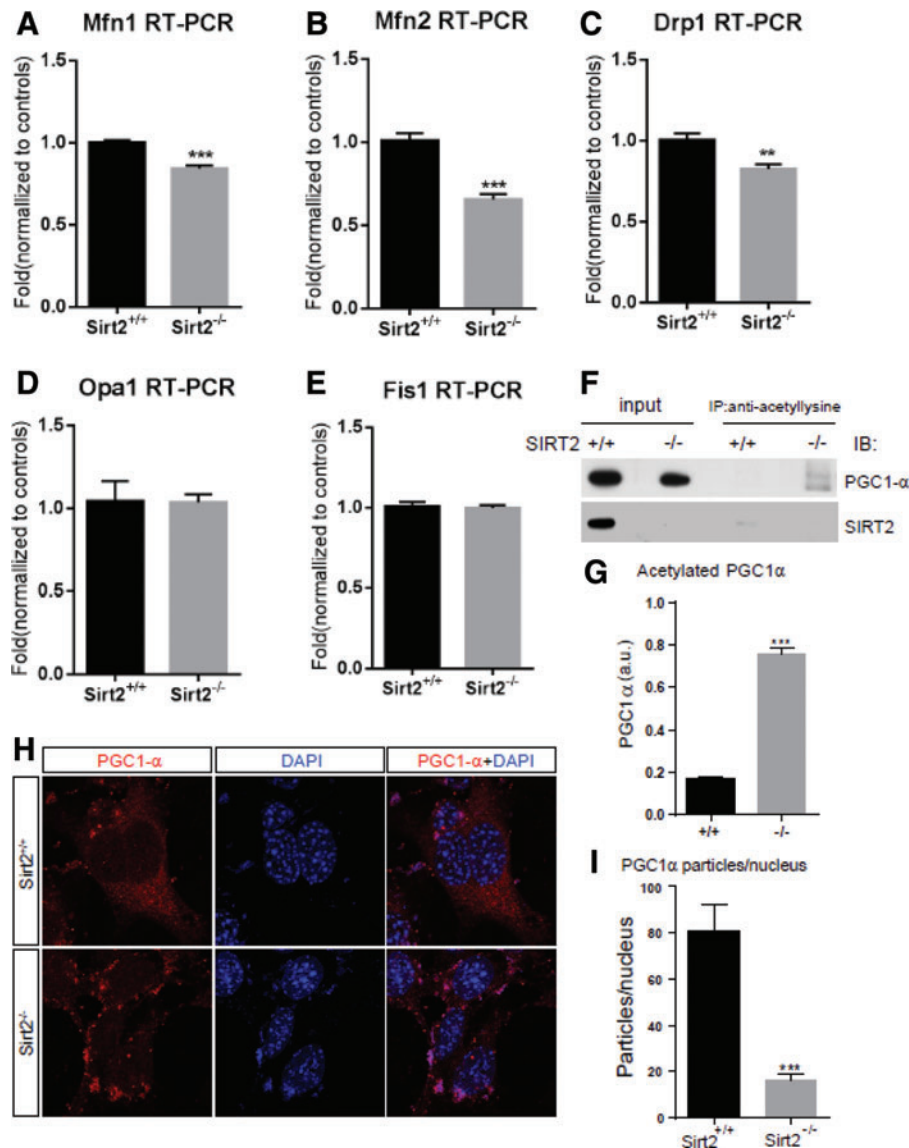

**SUPPLEMENTARY FIG. S4. Loss of Sirt2 increases PGC1 $\alpha$  acetylation level and inhibits PGC1 $\alpha$  transcription activity.** (A–E) Real-time reverse transcription polymerase chain reaction analysis of Mfn1, Mfn2, Drp1, Opa1, and Fis1 expression in Sirt2<sup>+/+</sup> and Sirt2<sup>-/-</sup> mice (three per genotype). Data are presented as the mean  $\pm$  SEM ( $n=5$ ). \*\* $p < 0.01$ , \*\*\* $p < 0.001$ . Lysates from brain tissues of Sirt2<sup>+/+</sup> and Sirt2<sup>-/-</sup> mice were harvested, IPed with an anti-acetyllysine antibody, and, subsequently, immunoblotted with antibodies against PGC1 $\alpha$ . Quantification of acetylated PGC1 $\alpha$ .  $N=3$  mice per genotype. Data are presented as the mean  $\pm$  SEM. \*\*\* $p < 0.001$ . MEFs cells were stained with anti-PGC1 $\alpha$  antibody and 4',6-diamidino-2-phenylindole, and representative immunofluorescent images are shown. Particles in the nucleus were counted with ImageJ. Error bars represent one standard deviation from the mean. \*\*\* $p < 0.001$ . (F) Lysates from brain tissues of Sirt2<sup>+/+</sup> and Sirt2<sup>-/-</sup> mice were harvested, (IP)ed with an anti-acetyllysine antibody, and subsequently immunoblotted with antibodies against PGC1 $\alpha$ . (G) Quantification of acetylated PGC1 $\alpha$ .  $N=3$  mice per genotype. Data are presented as the mean  $\pm$  SEM. \*\*\* $p < 0.001$ . (H) MEFs cells were stained with anti-PGC1 $\alpha$  antibody and DAPI, and representative immunofluorescent (IFC) images are shown. (I) Particles in nucleus were counted with ImageJ. Error bars represent one standard deviation from the mean. \*\*\* $p < 0.001$ .
