# Supplementary material
Source: PubMed Central journal article supplement (PMC5444513)
Supplement: Supp_Fig5.pdf [file Supp_Fig5.pdf]

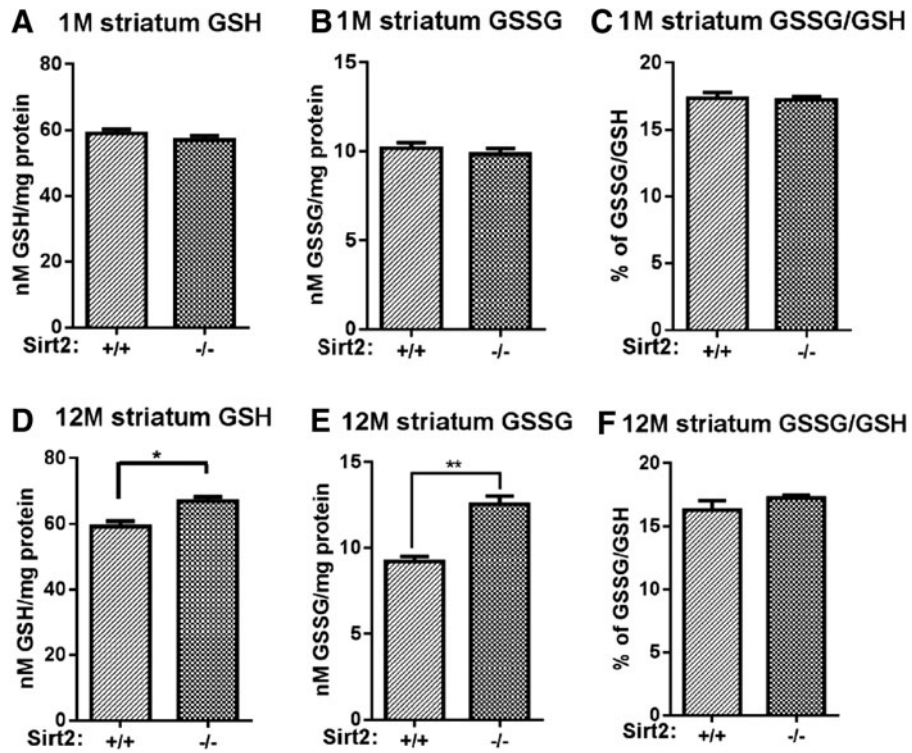

**SUPPLEMENTARY FIG. S5. Loss of Sirt2 *in vivo* increases oxidative stress in 12-month-old mice but not in 1-month-old mice.** The central nervous system striatum samples from *Sirt2*<sup>+/+</sup> and *Sirt2*<sup>-/-</sup> mice at 1 and 12 months of age were also used to determine GSH (A, D) levels, GSSG (B, E) levels, and the GSSG/GSH (C, F) ratio. *N*=3 per genotype. \**p*<0.05, \*\**p*<0.01. GSH, glutathione; GSSG, oxidized glutathione.
