# Supplementary material
Source: PubMed Central journal article supplement (PMC5444513)
Supplement: Supp_Fig6.pdf [file Supp_Fig6.pdf]

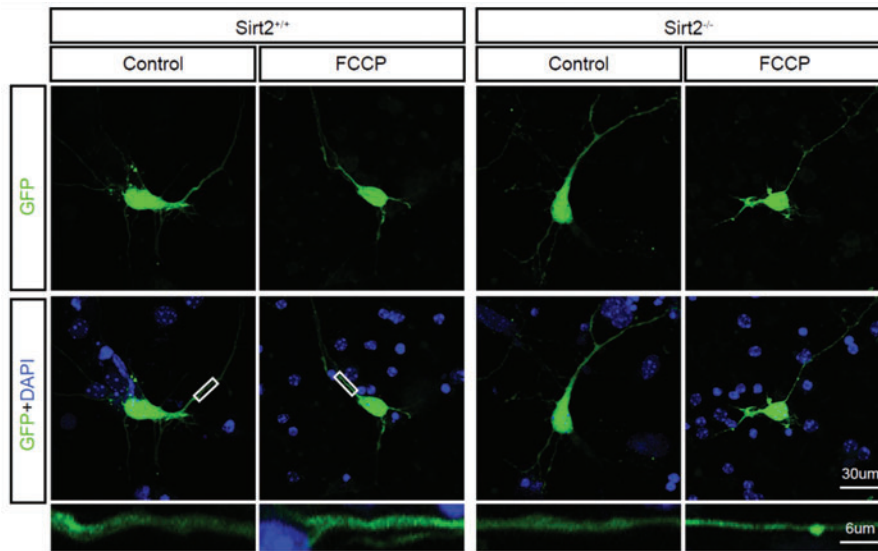

**SUPPLEMENTARY FIG. S6. No change of the cytoplasmic appearance with FCCP treatment compared with nontreatment.** Primary hippocampal neurons from Sirt2<sup>+/+</sup> and Sirt2<sup>-/-</sup> P0 pups were transiently transfected with GFP at 5 days *in vitro* and treated with 10 nM FCCP for 1 h, followed by fixation by 4% PFA and immunofluorescence microscopy. Scale bar: 30  $\mu$ m (*top two panels*) or 6  $\mu$ m (*bottom panel*). All experiments were performed in triplicate. Representative images are shown. FCCP, carbonyl cyanide-4-(trifluoromethoxy) phenylhydrazine; GFP, green fluorescent protein.
