# Supplementary material
Source: PubMed Central journal article supplement (PMC5444513)
Supplement: Supp_Table1.pdf [file Supp_Table1.pdf]

Table 1. In Vivo Mass spectrometry proteins (Sirt2<sup>+/+</sup> vs. Sirt2<sup>-/-</sup>)

|    | Identified Proteins                                 | Accession Number | Gene Name | Mito- or not | M.W.    | Counts |     |       |
|----|-----------------------------------------------------|------------------|-----------|--------------|---------|--------|-----|-------|
|    |                                                     |                  |           |              |         | +/+    | -/- | ratio |
| 1  | ATP synthase subunit beta, mitochondrial            | P56480           | ATPB      | Yes          | 56 kDa  | 6      | 1   | 0.2   |
| 2  | Malate dehydrogenase, mitochondrial                 | P08249           | MDHM      | Yes          | 36 kDa  | 175    | 53  | 0.3   |
| 3  | Ubiquitin carboxyl-terminal hydrolase isozyme L1    | Q9R0P9           | UCHL1     | No           | 25 kDa  | 3      | 1   | 0.3   |
| 4  | Hydroxyacyl-coenzyme A dehydrogenase, mitochondrial | Q61425           | HCDH      | Yes          | 34 kDa  | 8      | 3   | 0.4   |
| 5  | ATP synthase subunit b, mitochondrial               | Q9CQ07           | AT5F1     | Yes          | 29 kDa  | 10     | 4   | 0.4   |
| 6  | Histone acetyltransferase p300                      | B2RWS6           | EP300     | No           | 264 kDa | 10     | 4   | 0.4   |
| 7  | Isocitrate dehydrogenase [NADP], mitochondrial      | P54071           | IDHP      | Yes          | 51 kDa  | 18     | 8   | 0.4   |
| 8  | Transaldolase                                       | Q93092           | TALDO     | No           | 37 kDa  | 18     | 8   | 0.4   |
| 9  | Dihydropyrimidinase-related protein 2               | O08553           | DPYL2     | No           | 62 kDa  | 2      | 1   | 0.5   |
| 10 | Elongation factor 1-alpha 1                         | P10126           | EF1A1     | No           | 50 kDa  | 4      | 2   | 0.5   |
| 11 | Fumarate hydratase, mitochondrial                   | P97807           | FUMH      | Yes          | 54 kDa  | 24     | 12  | 0.5   |
| 12 | Presequence protease, mitochondrial                 | Q8K411           | PREP      | Yes          | 117 kDa | 4      | 2   | 0.5   |
| 13 | ATP synthase subunit alpha, mitochondrial           | Q03265           | ATPA      | Yes          | 60 kDa  | 17     | 10  | 0.6   |
| 14 | Methylglutaconyl-CoA hydratase, mitochondrial       | Q9JLZ3           | AUHM      | Yes          | 33 kDa  | 15     | 9   | 0.6   |
| 15 | Myelin basic protein                                | P04370           | MBP       | No           | 27 kDa  | 23     | 15  | 0.7   |
| 16 | Aconitate hydratase, mitochondrial                  | Q99KI0           | ACON      | Yes          | 85 kDa  | 72     | 48  | 0.7   |
| 17 | Creatine kinase B-type                              | Q04447           | KCRB      | No           | 43 kDa  | 9      | 6   | 0.7   |
| 18 | CREB-binding protein                                | P45481           | CBP       | No           | 265 kDa | 6      | 4   | 0.7   |
| 19 | Cytochrome b-c1 complex subunit 1, mitochondrial    | Q9CZ13           | QCR1      | Yes          | 53 kDa  | 6      | 4   | 0.7   |
| 20 | Phosphate carrier protein, mitochondrial            | Q8VEM8           | MPCP      | Yes          | 40 kDa  | 6      | 4   | 0.7   |
| 21 | Pyruvate kinase isozymes M1/M2                      | P52480           | KPYM      | No           | 58 kDa  | 12     | 8   | 0.7   |
| 22 | Stress-70 protein, mitochondrial                    | P38647           | GRP75     | Yes          | 74 kDa  | 12     | 8   | 0.7   |
| 23 | Tubulin beta-4B chain                               | P68372           | TBB4B     | No           | 50 kDa  | 3      | 2   | 0.7   |
| 24 | Aspartate aminotransferase, mitochondrial           | P05202           | AATM      | Yes          | 47 kDa  | 166    | 113 | 0.7   |
| 25 | 60 kDa heat shock protein, mitochondrial            | P63038           | CH60      | Yes          | 61 kDa  | 14     | 10  | 0.7   |
| 26 | ATP synthase subunit d, mitochondrial               | Q9DCX2           | ATP5H     | Yes          | 19 kDa  | 22     | 16  | 0.7   |
| 27 | Dynamin-1                                           | P39053           | DYN1      | No           | 98 kDa  | 12     | 9   | 0.8   |
| 28 | ATP synthase subunit O, mitochondrial               | Q9DB20           | ATPO      | Yes          | 23 kDa  | 13     | 10  | 0.8   |
| 29 | Cytochrome c, somatic                               | P62897           | CYC       | Yes          | 12 kDa  | 5      | 4   | 0.8   |
| 30 | Heat shock cognate 71 kDa protein                   | P63017           | HSP7C     | No           | 71 kDa  | 6      | 5   | 0.8   |
| 31 | Transcriptional activator protein Pur-alpha         | P42669           | PURA      | No           | 35 kDa  | 6      | 5   | 0.8   |

|    |                                                                 |        |       |     |         |    |    |     |
|----|-----------------------------------------------------------------|--------|-------|-----|---------|----|----|-----|
| 32 | Dihydrolipoyl dehydrogenase, mitochondrial                      | O08749 | DLDH  | Yes | 54 kDa  | 30 | 28 | 0.9 |
| 33 | Glyceraldehyde-3-phosphate dehydrogenase                        | P16858 | G3P   | No  | 36 kDa  | 7  | 8  | 1.1 |
| 34 | Phosphoglycerate kinase 1                                       | P09411 | PGK1  | No  | 45 kDa  | 12 | 14 | 1.2 |
| 35 | Alpha-enolase                                                   | P17182 | ENOA  | No  | 47 kDa  | 6  | 8  | 1.3 |
| 36 | Gamma-enolase                                                   | P17183 | ENOG  | No  | 47 kDa  | 3  | 4  | 1.3 |
| 37 | Polyubiquitin-B                                                 | P0CG49 | UBB   | No  | 34 kDa  | 3  | 4  | 1.3 |
| 38 | 14-3-3 protein epsilon                                          | P62259 | 1433E | No  | 29 kDa  | 2  | 3  | 1.5 |
| 39 | Heat shock protein HSP 90-beta                                  | P11499 | HS90B | No  | 83 kDa  | 2  | 3  | 1.5 |
| 40 | Pyruvate dehydrogenase E1 component subunit beta, mitochondrial | Q9D051 | ODPB  | Yes | 39 kDa  | 2  | 3  | 1.5 |
| 41 | Cysteine and glycine-rich protein 1                             | P97315 | CSRP1 | No  | 21 kDa  | 3  | 5  | 1.7 |
| 42 | Cofilin-1                                                       | P18760 | COF1  | No  | 19 kDa  | 4  | 8  | 2   |
| 43 | Fibrous sheath-interacting protein 2                            | A2ARZ3 | FSIP2 | No  | 785 kDa | 1  | 2  | 2   |
| 44 | Serum albumin                                                   | P07724 | ALBU  | No  | 69 kDa  | 1  | 2  | 2   |
| 45 | Triosephosphate isomerase                                       | P17751 | TPIS  | No  | 32 kDa  | 1  | 2  | 2   |
| 46 | Protein DJ-1                                                    | Q99LX0 | PARK7 | No  | 20 kDa  | 2  | 7  | 3.5 |
| 47 | Alpha-synuclein                                                 | O55042 | SYUA  | No  | 14 kDa  | 2  | 8  | 4   |
| 48 | Fatty acid synthase                                             | P19096 | FAS   | No  | 272 kDa | 2  | 8  | 4   |
| 49 | Tubulin alpha-1B chain                                          | P05213 | TBA1B | No  | 50 kDa  | 1  | 9  | 9   |
